# Supplementary material for: Large-sized graphene oxide/modified tourmaline nanoparticle aerogel with stable honeycomb-like structure for high-efficiency PM2.5 capture
Source: Royal Society of Chemistry journal article supplement (doi:10.1039/c8ta05506h), 2018-01-01
Supplement: c8ta05506h1.pdf [file c8ta05506h1.pdf]

## Supporting Information

### **Large Sized Graphene Oxide/Modified Tourmaline Nanoparticles Aerogel with Stable Honeycomb-like Structure for High-efficiency PM<sub>2.5</sub> Capture**

Shiyu Zhang,<sup>1</sup> Jun Sun,<sup>1</sup> Di Hu,<sup>1</sup> Chao Xiao,<sup>1</sup> Qiqi Zhuo,<sup>2</sup> Jianjun Wang,<sup>1</sup> Chuanxiang Qin,<sup>1</sup>  
and Lixing Dai<sup>1</sup>

<sup>1</sup>College of Chemistry, Chemical Engineering and Materials Science, Soochow University,  
Suzhou, Jiangsu, 215123, People's Republic of China.

<sup>2</sup>College of Material Science & Engineering, Jiangsu University of Science and Technology,  
Zhenjiang, Jiangsu, 212003, People's Republic of China

Corresponding author e-mail: [dailixing@suda.edu.cn](mailto:dailixing@suda.edu.cn); [qinchuanxiang@suda.edu.cn](mailto:qinchuanxiang@suda.edu.cn)

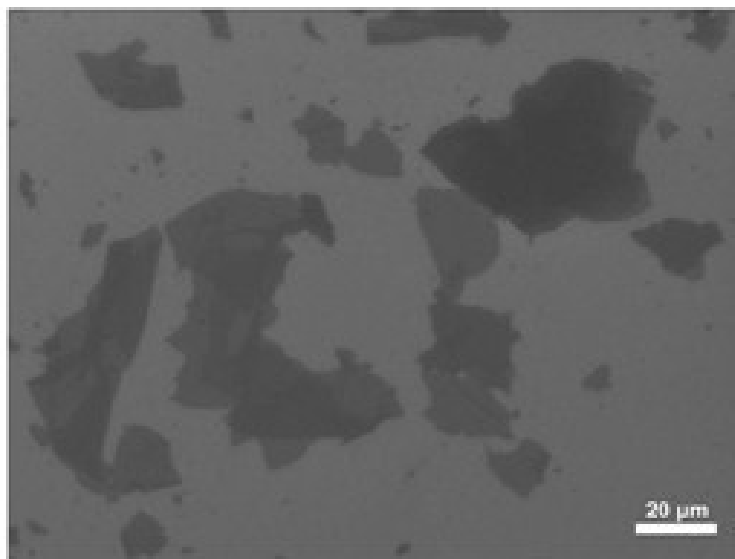

**Figure S1.** SEM image of LGO sheets used for preparation of aerogels. The sizes of LGO sheets are mostly (>97.6%) larger than  $50 \mu\text{m}^2$ .

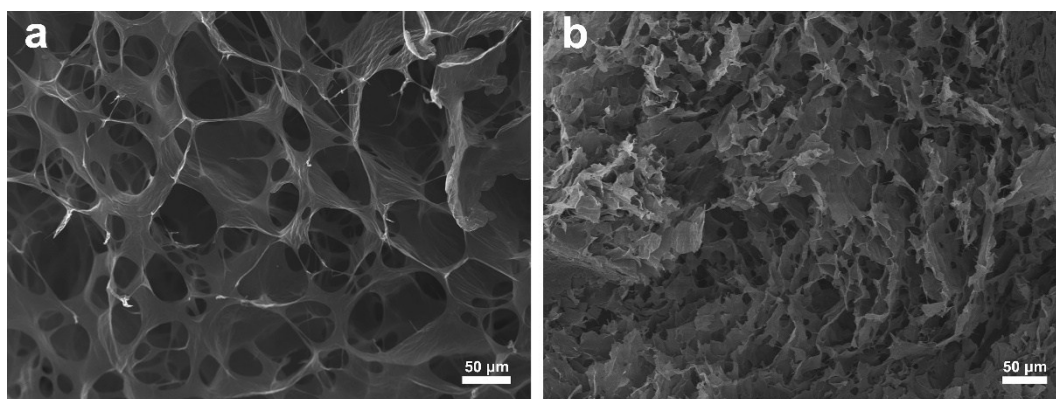

**Figure S2.** (a) SEM image of cross-section of LA. (b) SEM image of longitudinal section of LA.

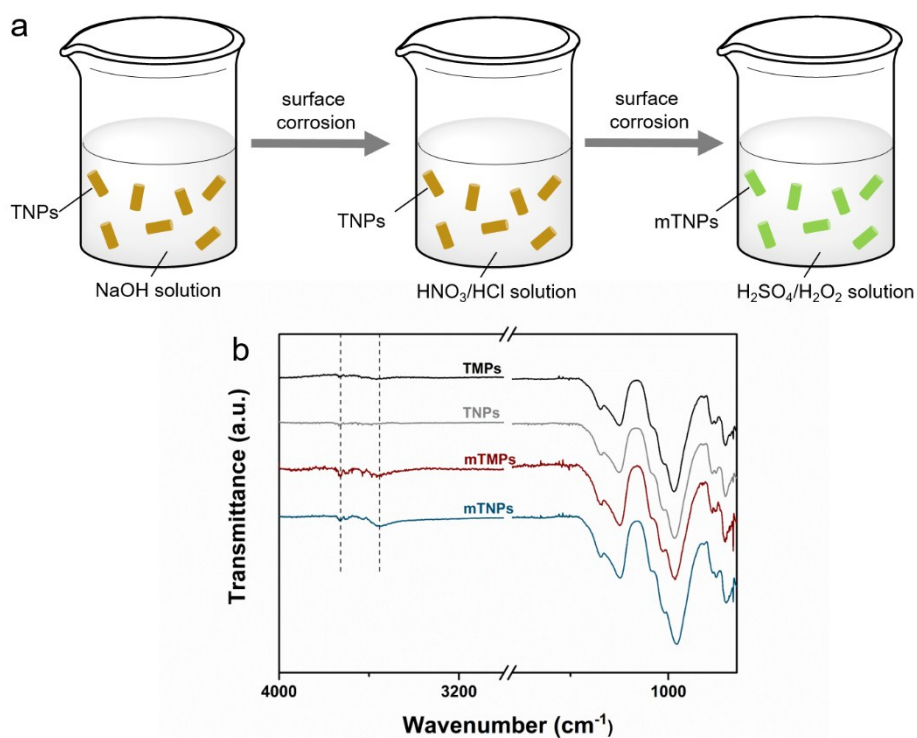

**Figure S3.** (a) Schematic of the processes for the modification of tourmaline with strong alkali, strong acid, and oxidants, respectively; (b) FTIR spectra of TNPs, mTNPs and mTNPs.

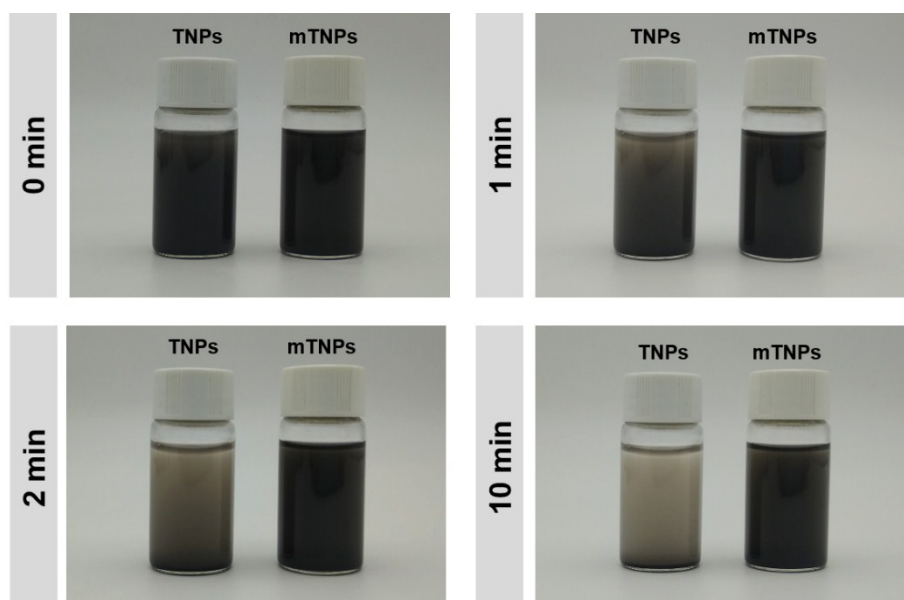

**Figure S4.** Digital photographs of TNPs and mTNPs aqueous dispersions at different staying time after sonication. The particle concentrations in the dispersions are  $10 \mu\text{g mL}^{-1}$ .

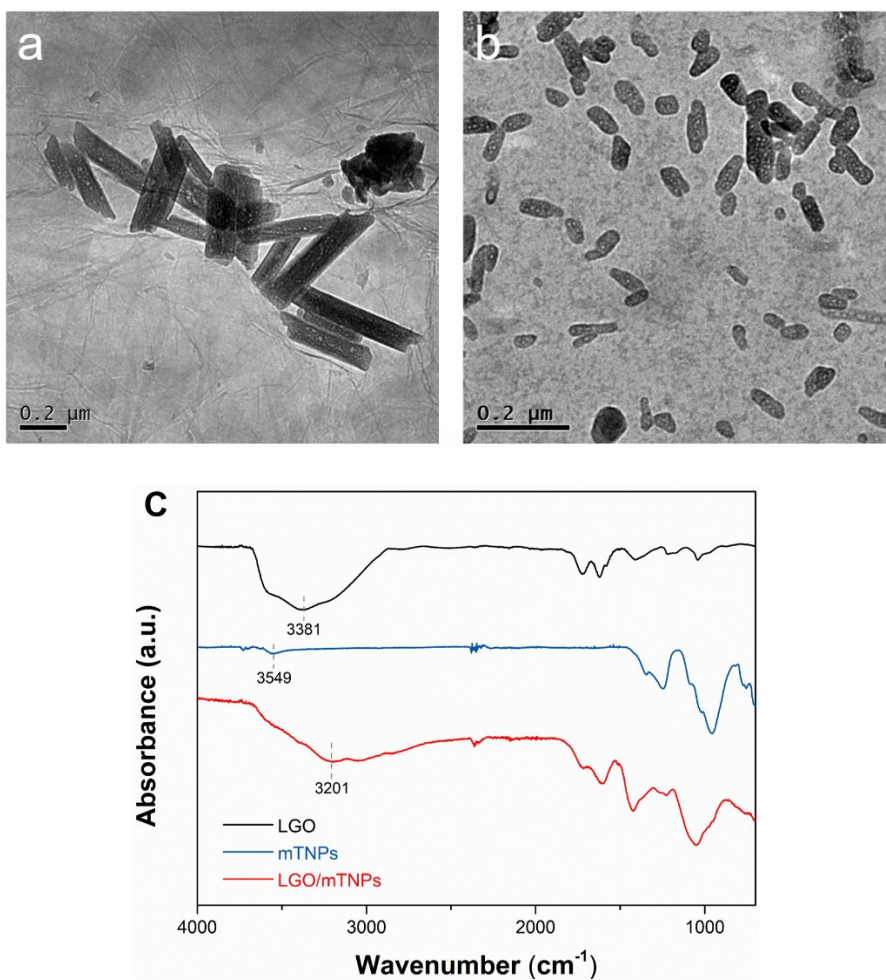

**Figure S5.** TEM images of TNPs (a) and mTNPs (b) distributed on LGO surface; (c) FTIR spectra of LGO, mTNPs and LGO/mTNPs(LTA5). That the sizes of mTNPs is much smaller than TNPs is caused by chemical corrosion during the modification.

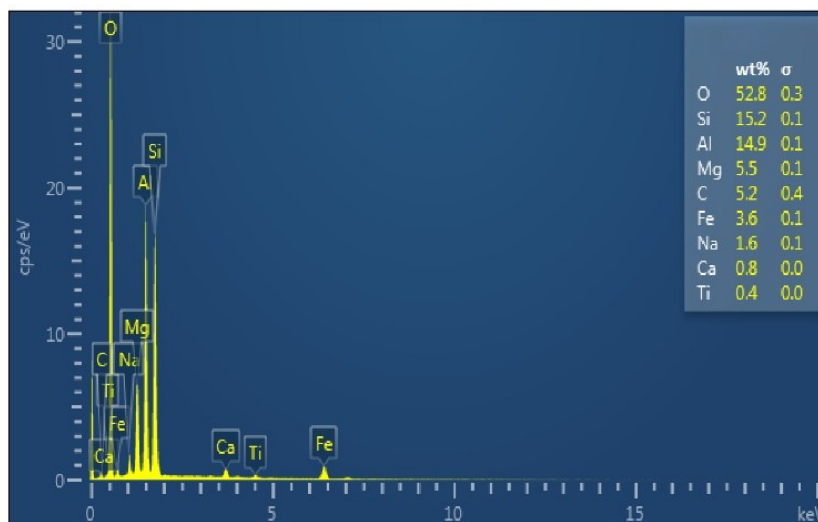

**Figure S6.** EDS spectra of mineral tourmaline. EDS curve indicates that mineral tourmaline contains elements such as oxygen, silicon, aluminum, magnesium, carbon, iron, and so on.

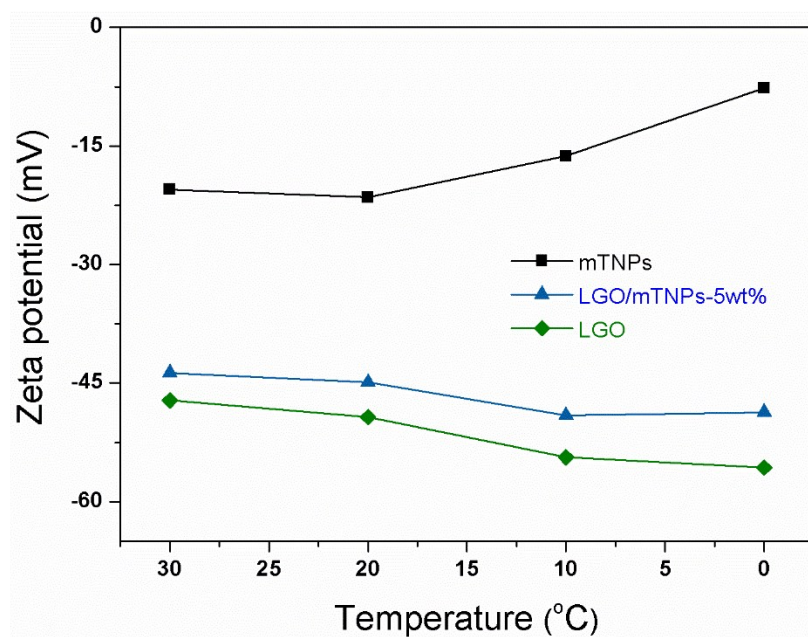

**Figure S7.** Zeta potential of mTNPs, LGO/mTNPs (mTNPs loading 5wt%) and LGO aqueous dispersions with different temperatures. Concentration for both LGO and LGO/mTNPs dispersions is  $3 \text{ mg mL}^{-1}$ , and concentration of mTNPs aqueous dispersion is  $0.03 \text{ mg mL}^{-1}$ .

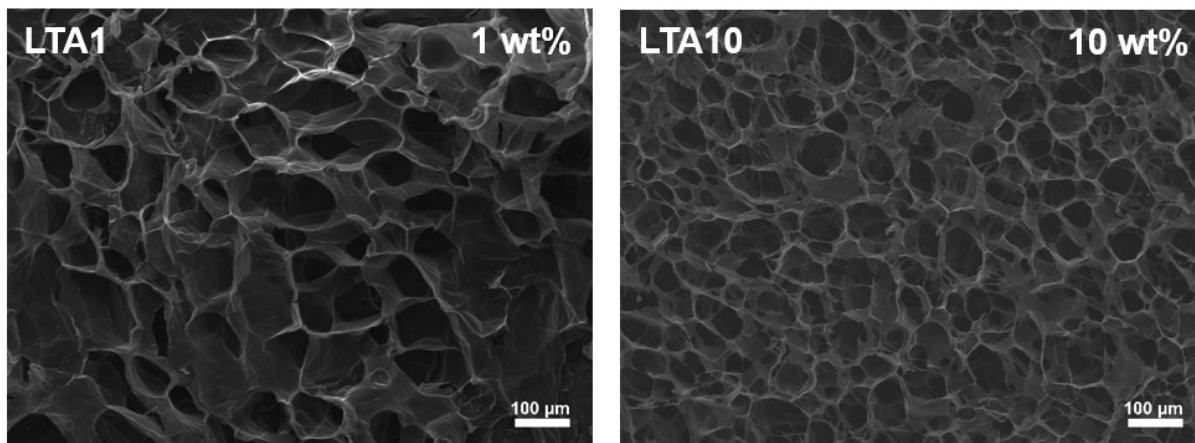

**Figure S8.** SEM images of cross-section of LTA1 and LTA10.

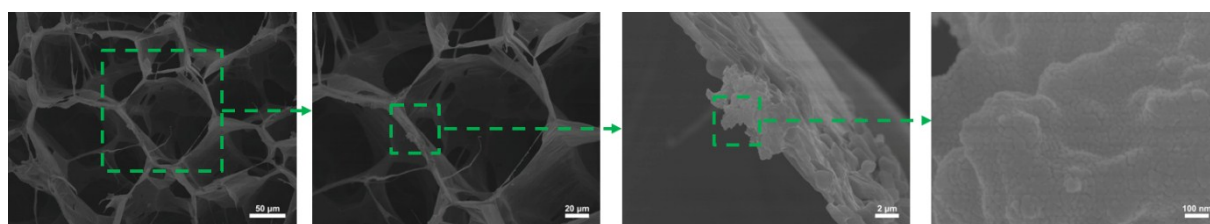

**Figure S9.** SEM images of LTA5 after PM<sub>2.5</sub> capture test for 10 min. The magnification is gradually large from left to right. PM<sub>2.5</sub> particles tend to aggregate on LGO sheets of LTA5.

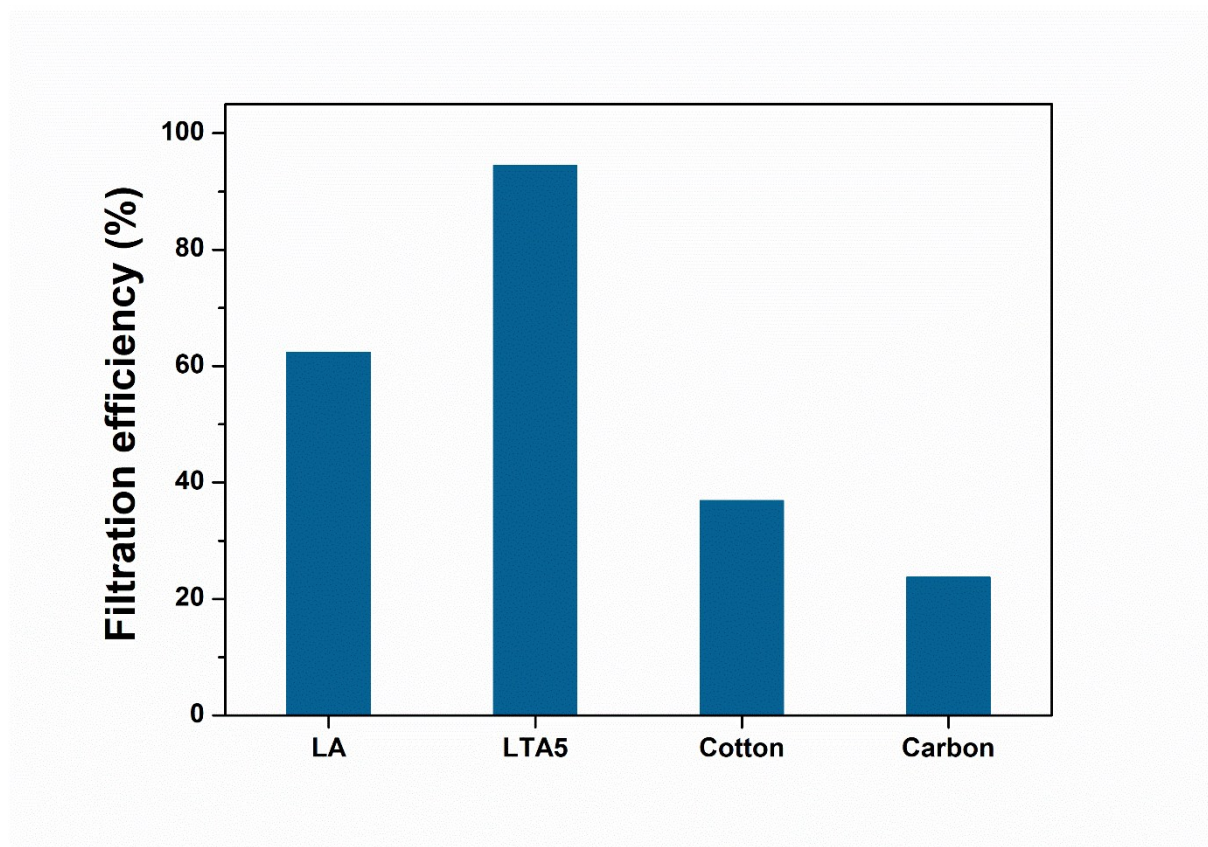

**Figure S10.** Filtration efficiency comparison for  $PM_{2.5}$  among LA, LTA5, cotton and activated carbon with the same thickness 1mm.

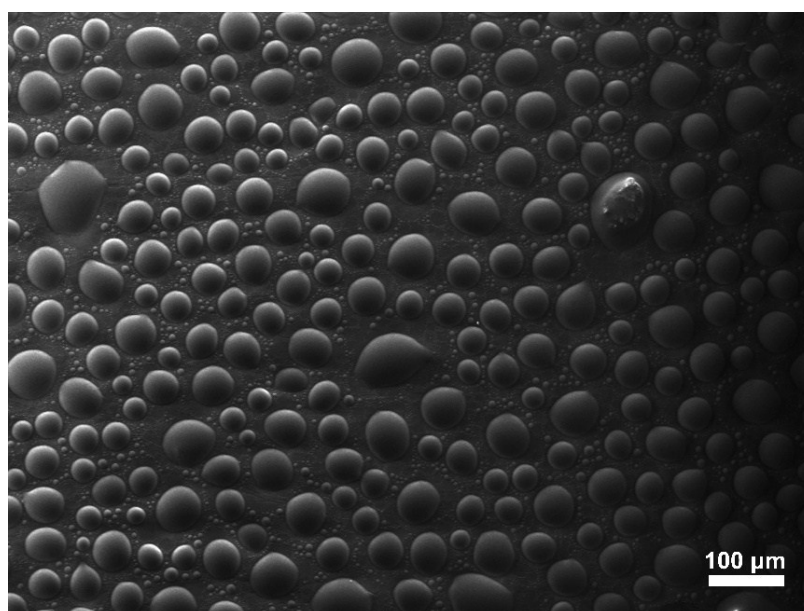

**Figure S11.** SEM image of aggregated droplet  $PM_{2.5}$  on a silicon chip.

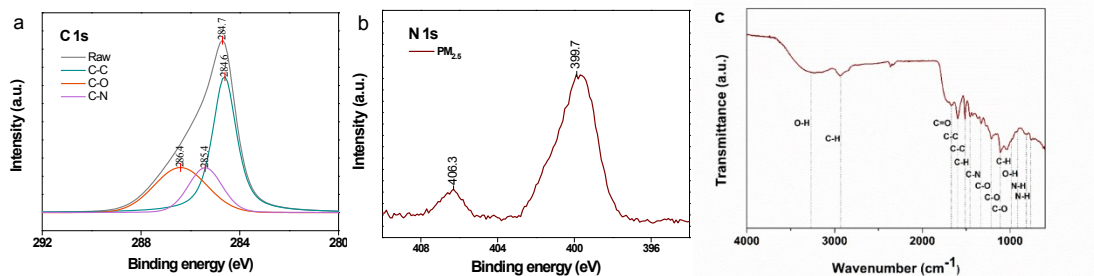

**Figure S12.** (a) C 1s XPS spectra of PM<sub>2.5</sub>. (b) N 1s XPS spectra of PM<sub>2.5</sub>. (c) FTIR spectra of PM<sub>2.5</sub>. XPS only detected the surface chemical characteristics (about 5 nm in depth) of condensate PM<sub>2.5</sub> collected on a silicon chip. In FTIR spectrum, the peaks appear at 3268.9, 2943.5, 1666.1, 1597.9, 1513.8, 1456.8, 1330.9, 1215.3, 1110.7, 1037.3, 984.8, 916.8, 807.1 and 765.3 cm<sup>-1</sup>, manifesting the existence of C-C, C=C, C-H, C-N, N-H, O-H, C-O and C=O functional groups.

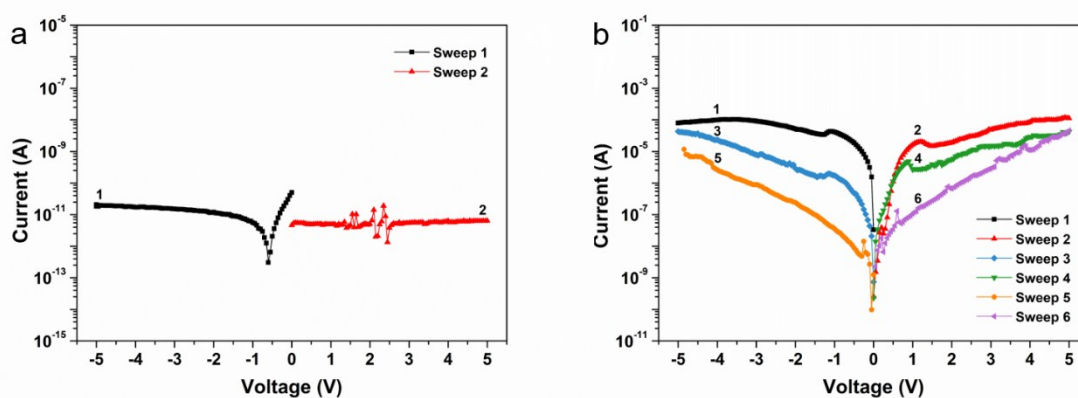

**Figure S13.** The electrical characteristics of LTA5 under long term idle state (a) and liquid nitrogen cooling state (b).
